# Supplementary material
Source: MDPI journal article supplement (https://www.mdpi.com/2673-4591/37/1/70)
Supplement: s1 [file s1]

# Effect of Thermal Processing on Carotenoids in Fortified Bread

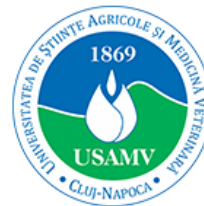

**Edward MUNTEAN**

*University of Agricultural Sciences and Veterinary Medicine Cluj Napoca, Romania*

*e-mail: [edimuntean@yahoo.com](mailto:edimuntean@yahoo.com)*

# Introduction

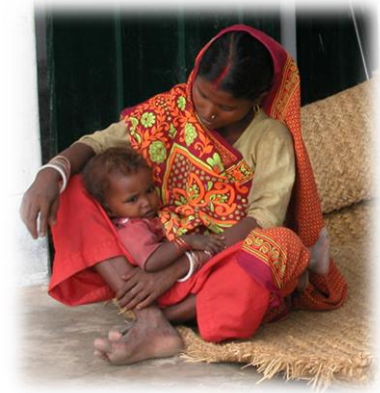

- Vitamin A deficiency is a major public health issue in many low-income countries.
- Bread is an ideal food vector for fortification because it is a staple food in many parts of the world
- Bread fortification with synthetic or natural provitamin A carotenoids can provide a solution for vitamin A deficiency.

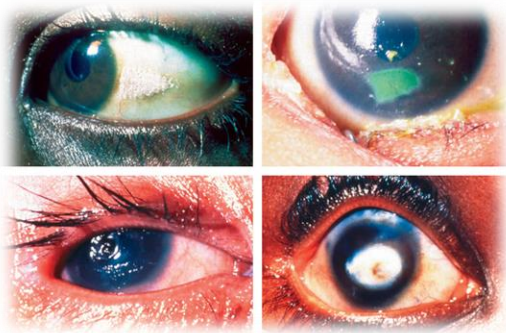

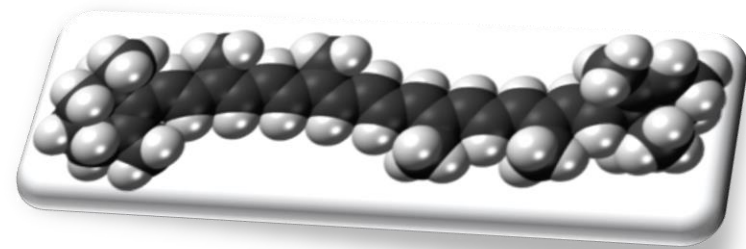

# Introduction (cont.)

- Carotenoids are biologically active compounds with numerous health benefits, such as reducing the risk of lung, breast, colon, and prostate cancers, as well as UV-induced skin damage, coronary heart disease, cataracts, and macular degeneration.
- Carotenoids with  $\beta$ -ring end groups can act as provitamins A within the human body
- Challenges involving carotenoid fortification:
  - Carotenoids are sensitive to environmental conditions such as heat, light, and contact with oxidants.
  - Proper handling is necessary to obtain the desired effects.

# Introduction (cont.)

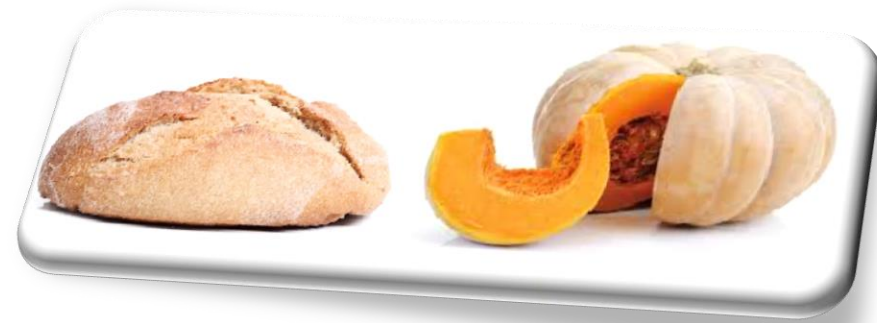

- Bread fortification with carotenoids of natural origin is an important factor in ensuring consumers' acceptance and compliance, hence this study targets fortified bread obtained through the straight-dough procedure, in which a puree made from *Cucurbita maxima* Duch. fruits was added.
- Because carotenoids are heat-sensitive biomolecules, high performance liquid chromatography (HPLC) with photodiode-array detection was used as method of analysis, this being the most appropriate analytical technique for their analysis.

# Research objectives

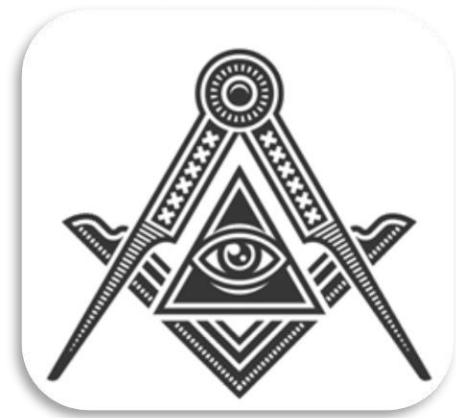

- To investigate the effect of thermal processing on carotenoids from fortified bread using HPLC as analytical tool.
- To provide relevant information for food technology and nutritional studies.
- To support the creation of a functional food that offers health benefits beyond combating vitamin A deficiency.



# Material and methods

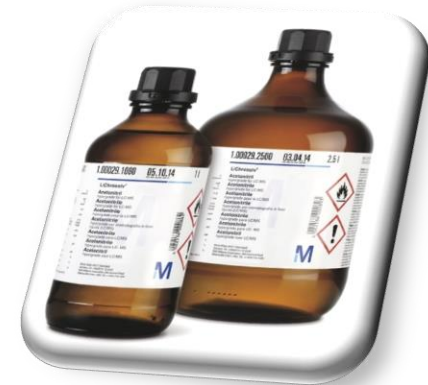

## *Materials*

- All solvents for chromatography were HPLC grade purity (Merck) and they were filtered (0.45  $\mu\text{m}$  Whatman filters) then degassed in an ultrasonic bath, under vacuum, before use; solvents for extraction were p.a. quality, freshly distilled; water was bidistilled, then degassed.
- Potassium hydroxide was from Merck.
- Reference carotenoids neoxanthin, violaxanthin, antheraxanthin, lutein zeaxanthin and all-E- $\beta$ ,  $\beta$ -carotene were from CaroteNature GmbH (Lupsingen, Switzerland).
- All the analytical operations were carried out in reduced light, avoiding samples heating at more than 40°C.
- Prior to injection in HPLC system, all samples were filtered (0.45  $\mu\text{m}$ , Whatman).

# Material and methods (cont.)

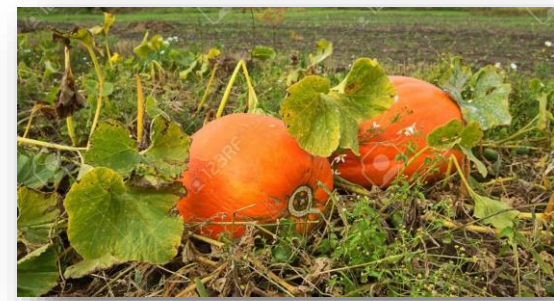

## ***Biological material & bread fortification***

- Mature *Cucurbita maxima* Duch. fruits were harvested from the experimental field of the University of Agricultural Sciences and Veterinary Medicine Cluj Napoca, Romania; fruits were sliced, the seeds and the placental tissues were removed, then the resulted slices were baked at 200°C for 60 minutes; after cooling, the crust was removed from each slice, these being homogenized in a blender.
- A laboratory-scale bread preparation was developed using the straight-dough procedure by mixing 300 g commercial wheat flour, 5 g dry yeast, 4 g sodium chloride, 100 g water and 100 g puree; the dough was mixed to optimum development, then was left for fermentation at 25°C for two hours, being then divided in portions of 100 g which were manually molded. Final dough fermentation was accomplished at room temperature, then baking was performed at 215°C for 25 minutes; the baked breads were allowed to cool on wooden racks for one hour at room temperature.

# Material and methods (cont.)

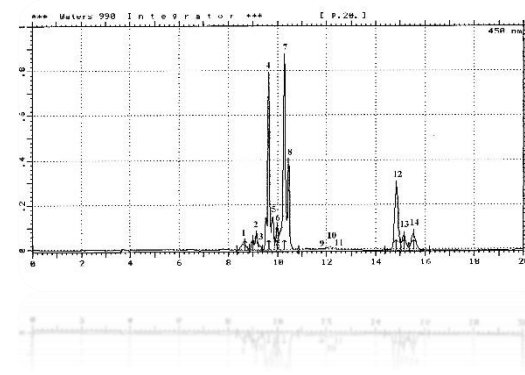

## ***Sampling, sample preparation and HPLC analysis***

- Bread sampling, sample preparation and HPLC analysis were performed according to a procedure published before [Muntean et al., 2004]

## ***Data processing***

- Chromatographic data analysis was accomplished using Waters 990 software (Waters Corporation, Milford, MA, USA), then chromatographic data were further processed using Excel (Microsoft Corporation, Redmond, WA, USA). The provitamin A concentrations were expressed in retinol equivalents (R.E.) according to FAO/WHO requirements [WHO].

*Muntean, E.; Muntean, N.; Modoran, C.; HPLC analysis of carotenoids in bread. Scientific Researches – Agroalimentary Processes and Technologies 2004, X (1), 186-190.*



# Results

Reversed-phase HPLC enabled the quantification of three carotenes ( $\beta$ -carotene, 9Z- $\beta$ -carotene and 15Z- $\beta$ -carotene) and eight xanthophylls (neoxanthin, violaxanthin, cucurbitaxanthin A, lutein and zeaxanthin), highlighting that the major carotenoids from fortified bread were lutein, cucurbitaxanthin A and  $\beta$ , $\beta$ -carotene.

Figure 1. Concentrations' profile of carotenoids in baked *Cucurbita maxima* fruits puree used for fortification.

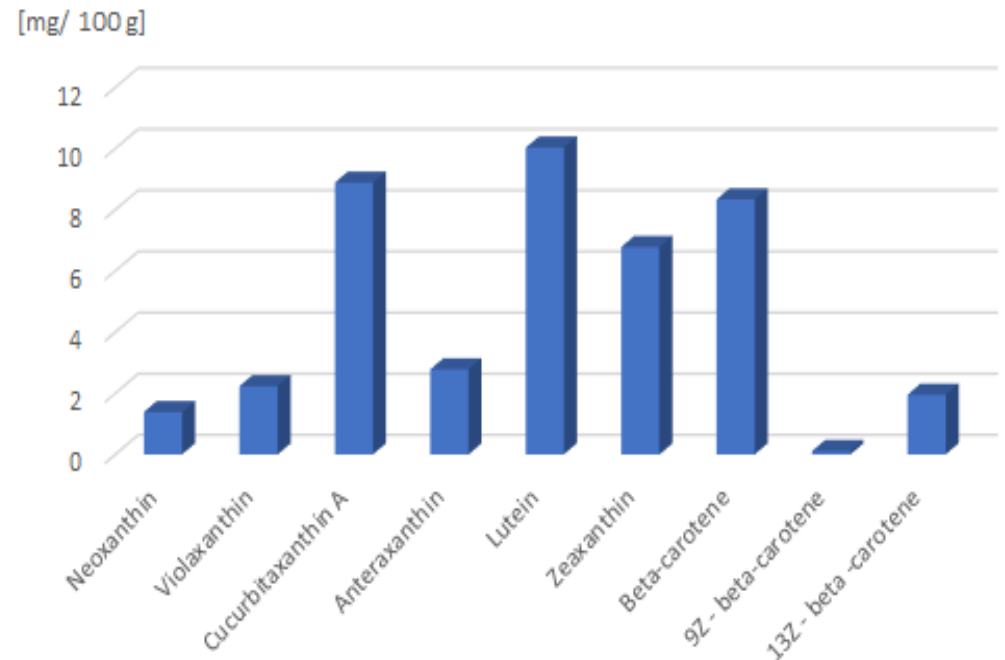

# Results

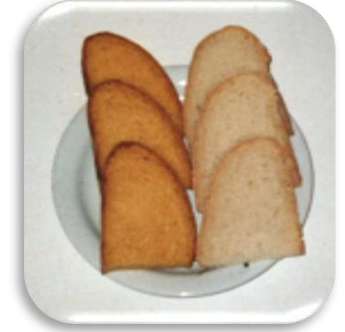

- Since the baked *Cucurbita maxima* fruits' puree contains considerable amounts of carotenoids, as can be seen in figure 1, its addition to the dough increased the carotenoid content (figure 2), the major ones being lutein,  $\beta$ -carotene and cucurbitaxanthin A.
- Thermal processing caused massive carotenoid degradation, this affecting both xanthophylls and carotenes (figures 2 and 3); zeaxanthin and violaxanthin were the most affected carotenoids, being degraded to the greatest extent, while cucurbitaxanthin A and lutein proved to be the most stable carotenoids under these circumstances.
- A special case is that of 9Z- $\beta$ , $\beta$ -carotene, a product of  $\beta$ , $\beta$ -carotene isomerization, since its overall concentration increased after thermal processing; this is the reason it was not included in figure 3.

# Results

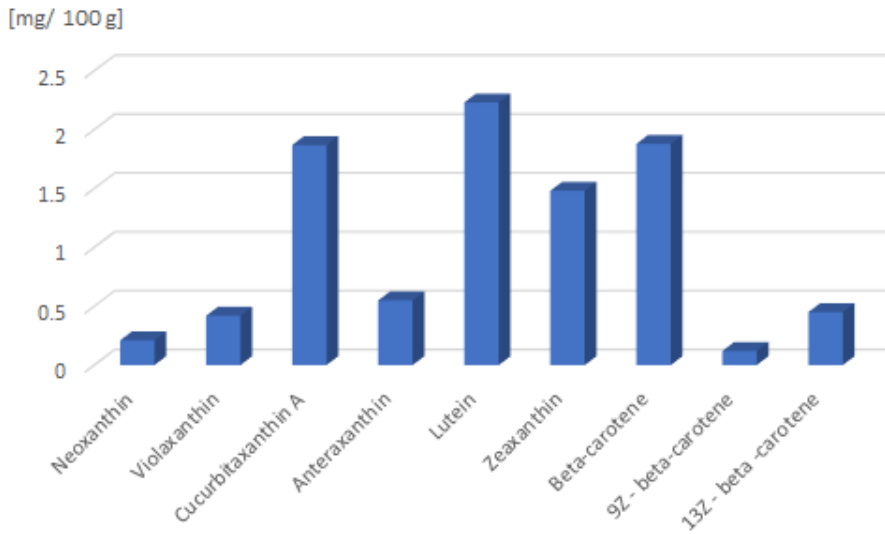

a.

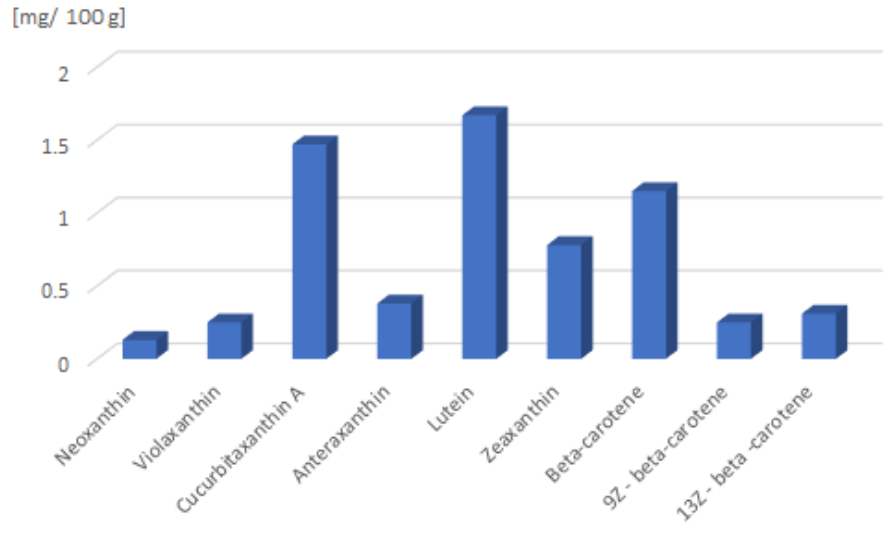

b.

Figure 2. Concentrations' profile of carotenoids in the initial dough (a) and in the fortified bread (b)

# Results

- Because thermal processing had an important effect on the most important provitamin A carotenoid from the fortified bread ( $\beta$ -carotene), the retinol equivalent was affected accordingly (figure 4).

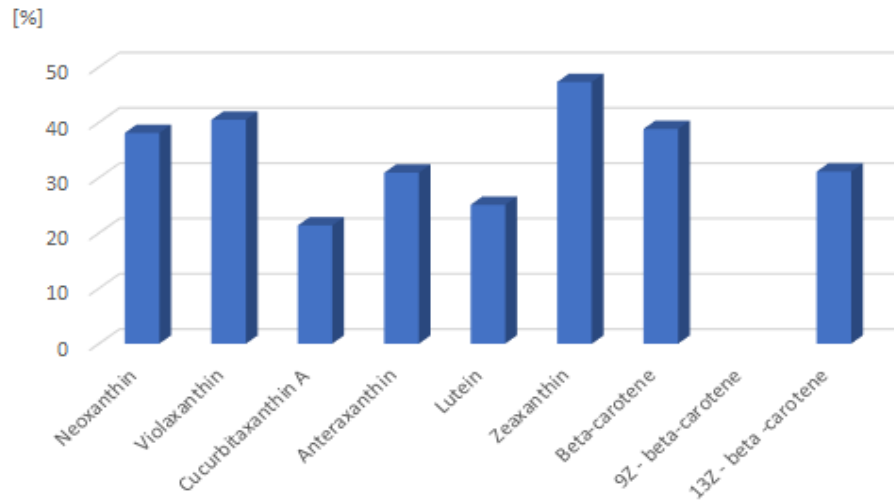

Figure 3. Comparative carotenoids' degradation as a result of thermal processing

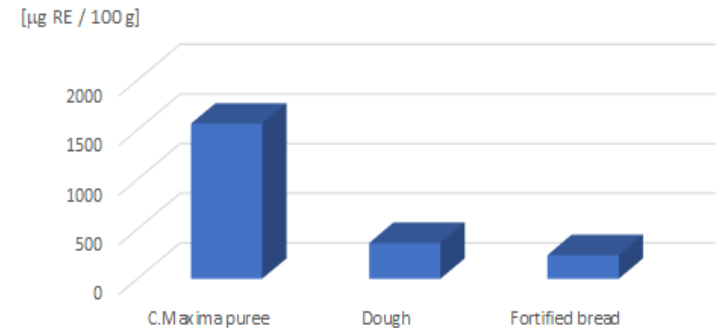

Figure 4. Comparative values for retinol equivalents in the investigated food matrices

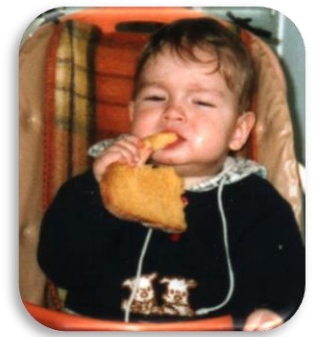

# Conclusions

- HPLC analysis highlighted that the major carotenoids from fortified bread were lutein, cucurbitaxanthin A and  $\beta,\beta$ -carotene, as well as the stability of the targeted compounds and the change in provitamin A activity as a result of thermal processing during baking; the most stable carotenoids proved to be lutein and cucurbitaxanthin A.
- The behavior of the involved carotenoids can provide relevant information for nutritional studies.
- Fortified bread with baked pumpkin is not only a possible solution for combating vitamin A deficiency, but also a true functional food.
- Bread products fortified with naturally occurring carotenoids may be of interest for consumers because of health benefit of the antioxidant effect, as compared with non-fortified products. The use of natural sources of carotenoids, such as *Cucurbita maxima* fruits, can also increase consumer acceptance and compliance.
- Fortified bread can also open new market opportunities for producers; being a solution to a serious public health issue, it can be used as a selling point for health-conscious consumers.



# Many thanks for your attention!

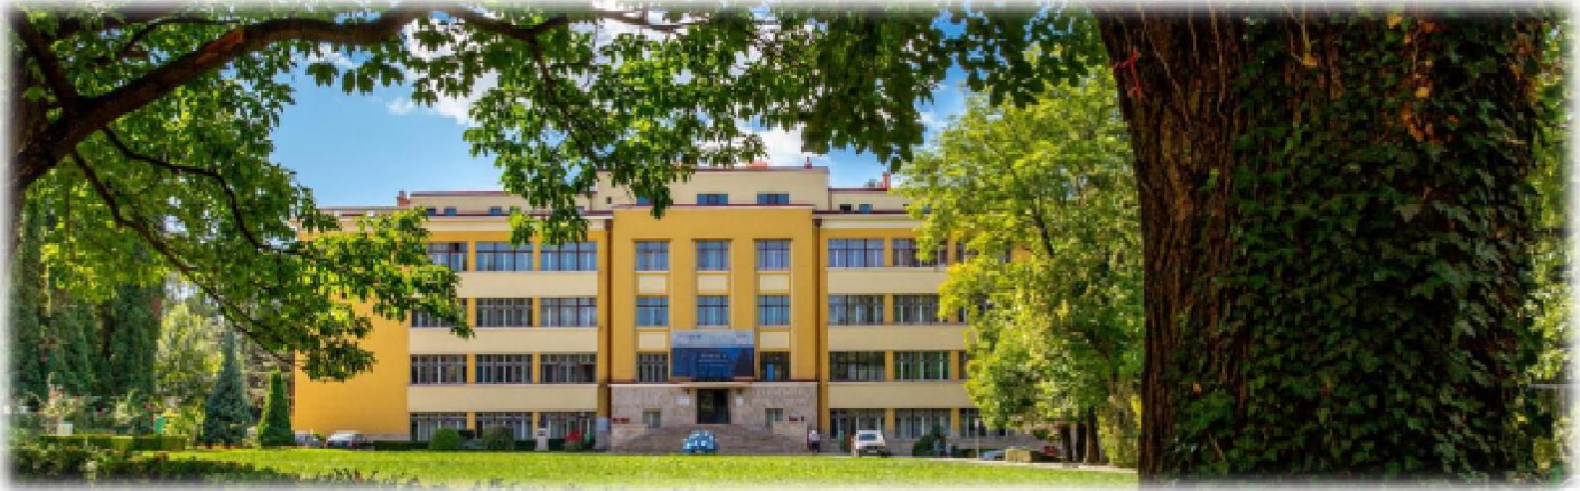

Please send your questions to  
[edimuntean@yahoo.com](mailto:edimuntean@yahoo.com)!

**ECP**  
**2023**

The 2nd International Electronic Conference on Processes:  
Process Engineering – Current State and Future Trends  
17–31 MAY 2023 | ONLINE
